# Supplementary material
Source: PubMed Central journal article supplement (PMC3860319)
Supplement: NIHMS516615-supplement-supplement_1.pdf [file NIHMS516615-supplement-supplement_1.pdf]

Supplemental Table 1. Description of growth factor-related genes

| Gene         | Chromosome |            | Major/Minor |        | MAF  |         | FDR HWE P |         |
|--------------|------------|------------|-------------|--------|------|---------|-----------|---------|
|              | Location   | dbSNP ID   | Coordinate  | Allele | NHW  | HISP/NA | NHW       | HISP/NA |
| <i>EGF</i>   | 4q25       | rs4444903  | 110834110   | A/G    | 0.39 | 0.54    | 0.96      | 0.62    |
| <i>ERBB2</i> | 17q21.1    | rs1136201  | 37879588    | A/G    | 0.23 | 0.15    | 0.98      | 0.95    |
|              |            | rs1810132  | 37866005    | T/C    | 0.31 | 0.40    | 1.00      | 0.91    |
|              |            | rs4252596  | 37855834    | C/A    | 0.13 | 0.04    | 0.99      | 0.01    |
| <i>FGF1</i>  | 5q31       | rs34001    | 141973599   | G/T    | 0.43 | 0.38    | 0.96      | 0.83    |
|              |            | rs152524   | 141992389   | A/G    | 0.44 | 0.27    | 0.89      | 0.68    |
|              |            | rs9324889  | 142048269   | C/T    | 0.29 | 0.28    | 0.96      | 0.93    |
|              |            | rs250092   | 141978243   | C/T    | 0.15 | 0.06    | 0.96      | 0.96    |
|              |            | rs34021    | 142002342   | G/A    | 0.35 | 0.25    | 0.97      | 0.61    |
|              |            | rs152528   | 142017860   | G/A    | 0.38 | 0.30    | 1.00      | 0.26    |
|              |            | rs1596776  | 142033695   | A/C    | 0.49 | 0.39    | 0.97      | 0.53    |
|              |            | rs13179022 | 141971281   | G/A    | 0.47 | 0.39    | 0.89      | 0.67    |
|              |            | rs4912868  | 141972713   | T/C    | 0.30 | 0.39    | 0.96      | 0.55    |
|              |            | rs34016    | 141998966   | G/A    | 0.14 | 0.24    | 0.97      | 0.99    |
|              |            | rs34019    | 142000545   | G/A    | 0.29 | 0.55    | 0.98      | 0.46    |
|              |            | rs13188142 | 142002232   | T/A    | 0.36 | 0.19    | 0.97      | 0.80    |
|              |            | rs6884797  | 142008657   | C/A    | 0.13 | 0.12    | 0.94      | 0.74    |
|              |            | rs249921   | 142010380   | T/C    | 0.24 | 0.29    | 0.96      | 0.86    |
|              |            | rs1609763  | 142018424   | C/A    | 0.28 | 0.33    | 0.97      | 0.36    |
|              |            | rs17099156 | 142019596   | G/A    | 0.18 | 0.23    | 0.96      | 0.98    |
|              |            | rs6893408  | 142022777   | G/A    | 0.15 | 0.16    | 0.96      | 0.14    |
|              |            | rs2070715  | 142024256   | G/A    | 0.41 | 0.50    | 0.96      | 0.72    |
|              |            | rs2052006  | 142025022   | T/C    | 0.28 | 0.15    | 0.96      | 0.64    |
|              |            | rs4912876  | 142073939   | A/G    | 0.34 | 0.29    | 0.96      | 0.99    |
| rs6580256    | 142076661  | C/T        | 0.11        | 0.19   | 0.96 | 0.43    |           |         |
| <i>FGF2</i>  | 4q26-q27   | rs7700205  | 123798183   | C/T    | 0.17 | 0.08    | 0.96      | 0.76    |
|              |            | rs17408757 | 123811472   | T/C    | 0.14 | 0.07    | 0.96      | 0.68    |
|              |            | rs308395   | 123746942   | C/G    | 0.14 | 0.27    | 0.99      | 0.71    |
|              |            | rs2034461  | 123784295   | C/T    | 0.17 | 0.16    | 0.93      | 0.93    |
|              |            | rs1476214  | 123813009   | G/A    | 0.39 | 0.33    | 0.96      | 0.55    |
|              |            | rs308420   | 123767943   | G/A    | 0.09 | 0.19    | 0.96      | 0.68    |
|              |            | rs308435   | 123772018   | C/A    | 0.15 | 0.12    | 0.96      | 0.25    |
|              |            | rs167428   | 123773439   | T/C    | 0.27 | 0.28    | 0.99      | 0.88    |
|              |            | rs11938826 | 123772614   | C/G    | 0.17 | 0.27    | 0.96      | 0.26    |
|              |            | rs308441   | 123774065   | C/T    | 0.19 | 0.26    | 0.97      | 0.73    |
|              |            | rs1960669  | 123782568   | G/T    | 0.14 | 0.05    | 0.97      | 0.25    |
|              |            | rs308379   | 123782896   | A/T    | 0.40 | 0.44    | 0.96      | 0.68    |
|              |            | rs308382   | 123783194   | A/G    | 0.17 | 0.12    | 0.99      | 0.43    |
|              |            | rs3789138  | 123784721   | G/A    | 0.43 | 0.47    | 0.89      | 0.68    |
|              |            | rs6534365  | 123785448   | C/T    | 0.35 | 0.24    | 0.96      | 0.93    |
| rs3804158    | 123814900  | A/G        | 0.45        | 0.48   | 0.98 | 0.73    |           |         |

|              |           |             |           |           |           |      |      |      |
|--------------|-----------|-------------|-----------|-----------|-----------|------|------|------|
| <i>FGFR2</i> | 10q26     | rs2981582   | 123352317 | C/T       | 0.40      | 0.40 | 0.86 | 0.97 |
| <i>PDGFB</i> | 22q13.1   | rs4990919   | 39622940  | C/T       | 0.33      | 0.32 | 0.96 | 1.00 |
|              |           | rs9622978   | 39625068  | G/T       | 0.43      | 0.35 | 0.96 | 0.54 |
|              |           | rs4821877   | 39629096  | T/C       | 0.54      | 0.45 | 0.95 | 0.62 |
|              |           | rs11704525  | 39629329  | C/A       | 0.48      | 0.31 | 0.96 | 0.32 |
|              |           | rs2247128   | 39630287  | G/A       | 0.34      | 0.19 | 0.86 | 0.07 |
|              |           | rs6001512   | 39632523  | G/A       | 0.08      | 0.04 | 0.13 | 0.47 |
|              |           | rs5757573   | 39633622  | T/C       | 0.38      | 0.21 | 0.96 | 0.01 |
|              |           | rs5750781   | 39634434  | C/A       | 0.30      | 0.15 | 0.97 | 0.08 |
|              |           | rs2857402   | 39636586  | C/G       | 0.29      | 0.15 | 0.98 | 0.02 |
|              |           | <i>NRG2</i> | 5q23-q33  | rs2431384 | 139292686 | A/G  | 0.14 | 0.14 |
| rs9686629    | 139329066 |             |           | A/G       | 0.10      | 0.11 | 0.96 | 0.59 |
| rs265159     | 139390752 |             |           | A/G       | 0.21      | 0.27 | 0.96 | 0.91 |
| rs3863190    | 139270620 |             |           | A/G       | 0.16      | 0.13 | 0.96 | 0.36 |
| rs6895139    | 139295821 |             |           | G/A       | 0.08      | 0.07 | 0.96 | 0.67 |
| rs265155     | 139386615 |             |           | G/A       | 0.21      | 0.17 | 0.96 | 0.98 |
| rs11738832   | 139294677 |             |           | A/G       | 0.54      | 0.38 | 1.00 | 0.69 |
| rs2916092    | 139414752 |             |           | A/G       | 0.26      | 0.34 | 0.96 | 0.80 |
| rs4912894    | 139236962 |             |           | T/C       | 0.53      | 0.36 | 0.97 | 0.78 |
| rs1800954    | 139245086 |             |           | T/C       | 0.12      | 0.11 | 0.96 | 0.45 |
| rs11745110   | 139246990 |             |           | G/A       | 0.09      | 0.11 | 0.96 | 0.82 |
| rs11748246   | 139260836 |             |           | G/C       | 0.20      | 0.13 | 0.96 | 0.91 |
| rs1422187    | 139276748 |             |           | T/C       | 0.24      | 0.19 | 0.96 | 0.61 |
| rs4912936    | 139293166 |             |           | G/A       | 0.22      | 0.15 | 0.98 | 0.74 |
| rs197197     | 139348915 |             |           | T/G       | 0.37      | 0.50 | 0.92 | 0.87 |
| rs11746363   | 139353857 |             |           | G/A       | 0.19      | 0.23 | 0.86 | 0.48 |
| rs265151     | 139378986 |             |           | C/A       | 0.17      | 0.16 | 0.96 | 0.36 |
| rs11167875   | 139384602 |             |           | C/T       | 0.52      | 0.39 | 0.96 | 0.58 |
| rs13173983   | 139410510 |             |           | T/C       | 0.27      | 0.18 | 1.00 | 0.01 |
| rs6580353    | 139410687 |             |           | C/T       | 0.24      | 0.32 | 0.68 | 0.67 |
| rs7707550    | 139410945 | A/T         | 0.44      | 0.52      | 0.96      | 0.30 |      |      |
| rs2436389    | 139416265 | T/G         | 0.37      | 0.21      | 0.96      | 0.07 |      |      |

Supplemental Table 2. Associations between growth factor genes and family history of breast cancer in first-degree relatives

|                         | No Family History |       | Family History  |              |          |       | Interaction p-value |              |      |          |
|-------------------------|-------------------|-------|-----------------|--------------|----------|-------|---------------------|--------------|------|----------|
|                         | Controls          | Cases | OR <sup>1</sup> | (95% CI)     | Controls | Cases | OR                  | (95% CI)     | raw  | adjusted |
|                         | N                 | N     |                 |              | N        | N     |                     |              |      |          |
| <i>FGF1</i> (rs9324889) |                   |       |                 |              |          |       |                     |              |      |          |
| CC                      | 1847              | 1486  | 1.00            |              | 204      | 311   | 1.00                |              | 0.03 | 0.44     |
| CT                      | 1457              | 1195  | 1.01            | (0.91, 1.12) | 203      | 227   | 0.73                | (0.57, 0.95) |      |          |
| TT                      | 287               | 238   | 1.03            | (0.85, 1.24) | 36       | 39    | 0.72                | (0.44, 1.18) |      |          |
| <i>FGF2</i> (rs308379)  |                   |       |                 |              |          |       |                     |              |      |          |
| AA                      | 1192              | 1032  | 1.00            |              | 173      | 190   | 1.00                |              | 0.02 | 0.24     |
| AT                      | 1719              | 1394  | 0.95            | (0.85, 1.06) | 202      | 297   | 1.37                | (1.04, 1.80) |      |          |
| TT                      | 678               | 493   | 0.87            | (0.75, 1.00) | 68       | 90    | 1.24                | (0.85, 1.82) |      |          |
| <i>FGF2</i> (rs308382)  |                   |       |                 |              |          |       |                     |              |      |          |
| AA                      | 2710              | 2186  | 1.00            |              | 298      | 431   | 1.00                |              | 0.01 | 0.09     |
| AG/GG                   | 880               | 733   | 1.02            | (0.91, 1.14) | 145      | 146   | 0.68                | (0.52, 0.90) |      |          |
| <i>NRG2</i> (rs265155)  |                   |       |                 |              |          |       |                     |              |      |          |
| GG/GA                   | 3468              | 2810  | 1.00            |              | 430      | 536   | 1.00                |              | 0.02 | 0.44     |
| AA                      | 121               | 107   | 1.10            | (0.84, 1.43) | 13       | 40    | 2.49                | (1.31, 4.74) |      |          |

<sup>1</sup>Odds Ratios (OR) and 95% Confidence Intervals (CI) adjusted for age, study center, BMI during referent year, parity and genetic ancestry
